# Supplementary material for: A type IVB secretion system adapted for bacterial killing, biofilm invasion and biocontrol
Source: Research Square preprint supplement (doi:10.21203/rs.3.rs-959170/v1), 2021-10-22
Supplement: Supplementary file 1 [file 9c3274d15dff895c5c73d5ec.pdf]

## Extended Data

### Extended Data Video

**Extended Data Video 1. CDC of IsoF::Gfp with KT2442.** KT2442 cells (grey, untagged) were killed by IsoF (green cells) in a contact-dependent manner. Dead cells (magenta) were visualized by staining with PI. The competition was followed for 4 hours by CLSM. Images were taken every 15 min.

### Extended Data Figures

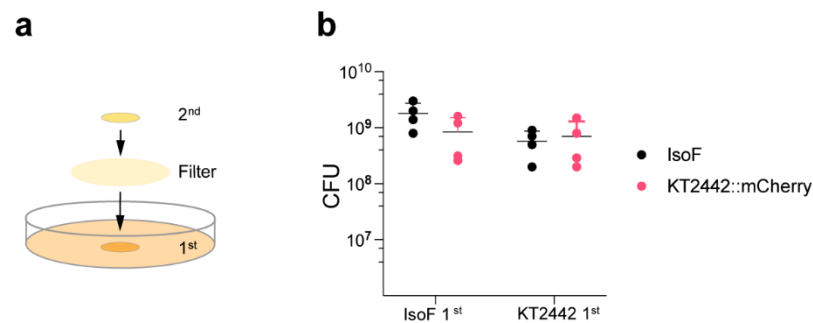

**Extended Data Figure 1. Inoculation of KT2442::mCherry and IsoF separated by a filter.** **a**, IsoF was inoculated on an ABC plate, a filter was placed atop the bacteria, which was subsequently inoculated with KT2442 or *vice versa*. **b**, CFUs were determined after 24 h of incubation. Data are mean  $\pm$  s.d. from four independent replicates ( $n = 4$ ).

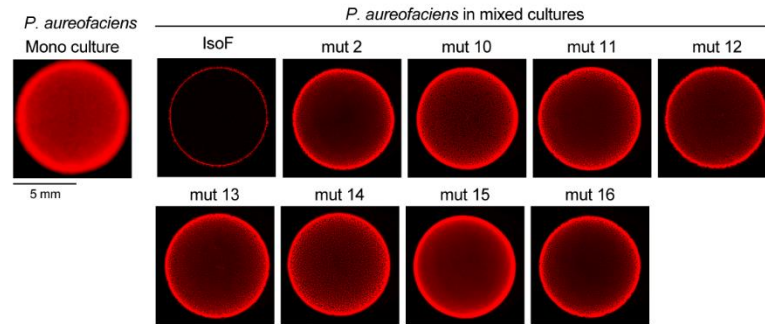

**Extended Data Figure 2. Contact-dependent competition between the IsoF mini-Tn5-insertion mutants and *P. aureofaciens*.** The mCherry (red) signal indicates the survival of *P. aureofaciens*::mCherry in competition with the mini-Tn5 insertion mutants. Representative pictures of at least 3 replicates are shown.

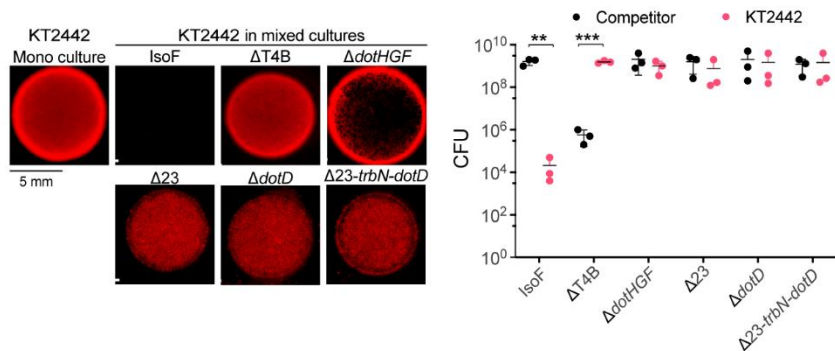

**Extended Data Figure 3. Contact-dependent competition of defined mutants against KT2442.** The wild-type strain and the deletion mutants  $\Delta dotHGF$ ,  $\Delta 23$ ,  $\Delta dotD$ ,  $\Delta 23-trbN-dotD$  and  $\Delta T4B$  were co-inoculated with KT2442 tagged with mCherry. Representative pictures of at least 3 replicates are shown. CFUs were determined after 24 h of incubation. Data are mean  $\pm$  s.d. of three independent biological replicates ( $n=3$ ). Unpaired t-test, \*\* $P < 0.01$ ; \*\*\* $P < 0.001$ .

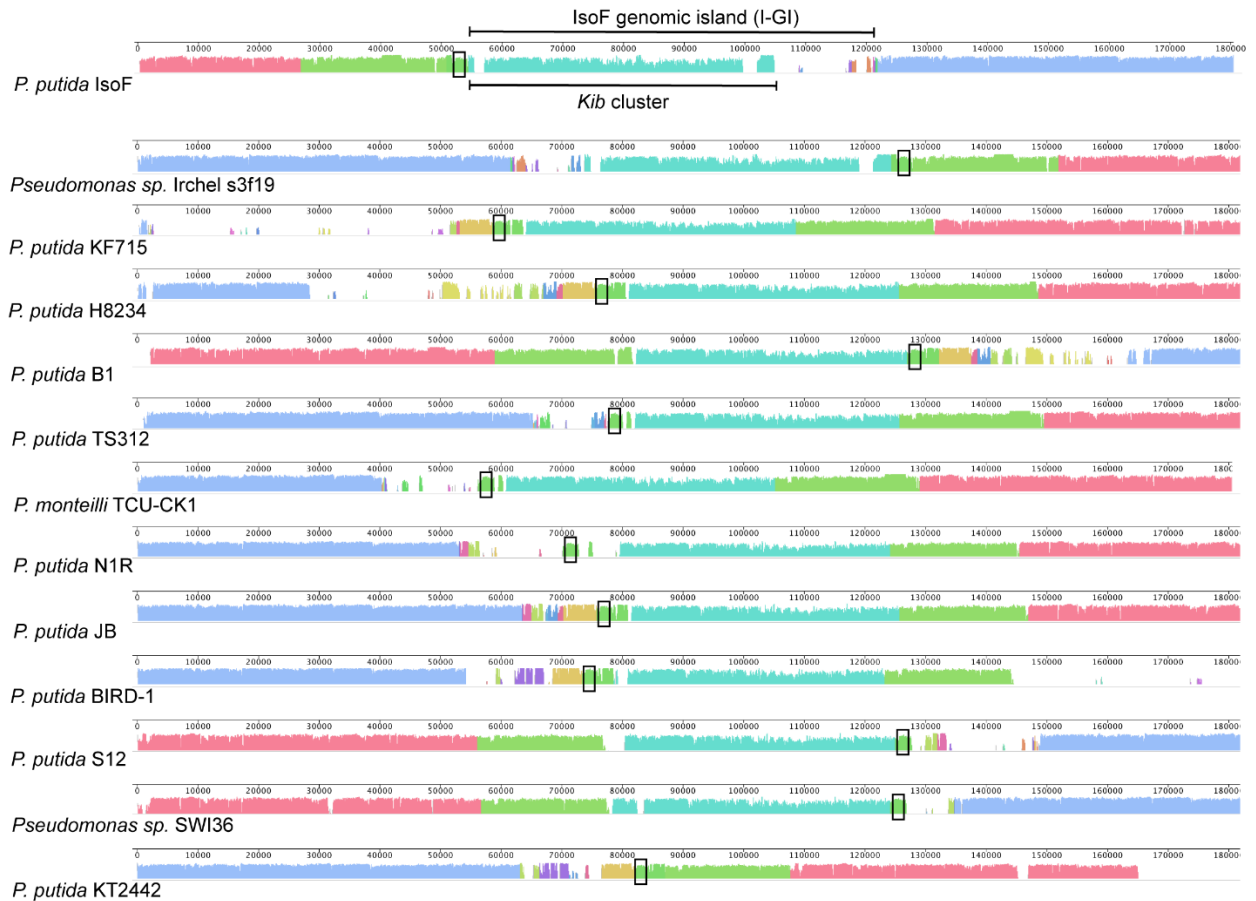

**Extended Data Figure 4. Multiple genome alignment of *kib* loci.** The *kib* regions from eleven *Pseudomonas* strains were compared and aligned with the IsoF-GI region using the Mauve software<sup>1</sup>. *P. putida* KT2440 (AE015451.2) was used as a reference strain not carrying this genomic element. Regions with identical colors represent local collinear blocks (LCB) of conserved DNA sequence. Low identity regions are shown without LCB. The *kib* gene cluster regions are indicated in light blue. The rectangular box (black) indicates the same position in a homologous region that is shared by all strains. The strains' accession numbers are: *Pseudomonas* sp. Irchel (NZ\_FYDW01000002), *P. putida* KF715 (AP015029.1), *P. putida* H8234 (CP005976.1), *P. putida* B1 (NZ\_CP022560.1), *P. putida* TS312 (NZ\_AP022324.1), *P. monteylli* TCU-CK1 (NZ\_CP040324.1), *P. putida* N1R (NZ\_LT707061.1), *P. putida* JB (NZ\_CP016212.1), *P. putida* BIRD-1 (CP002290.1), *P. putida* S12 (NZ\_CP009974.1), *Pseudomonas* sp. SWI36 (NZ\_CP026675.1).

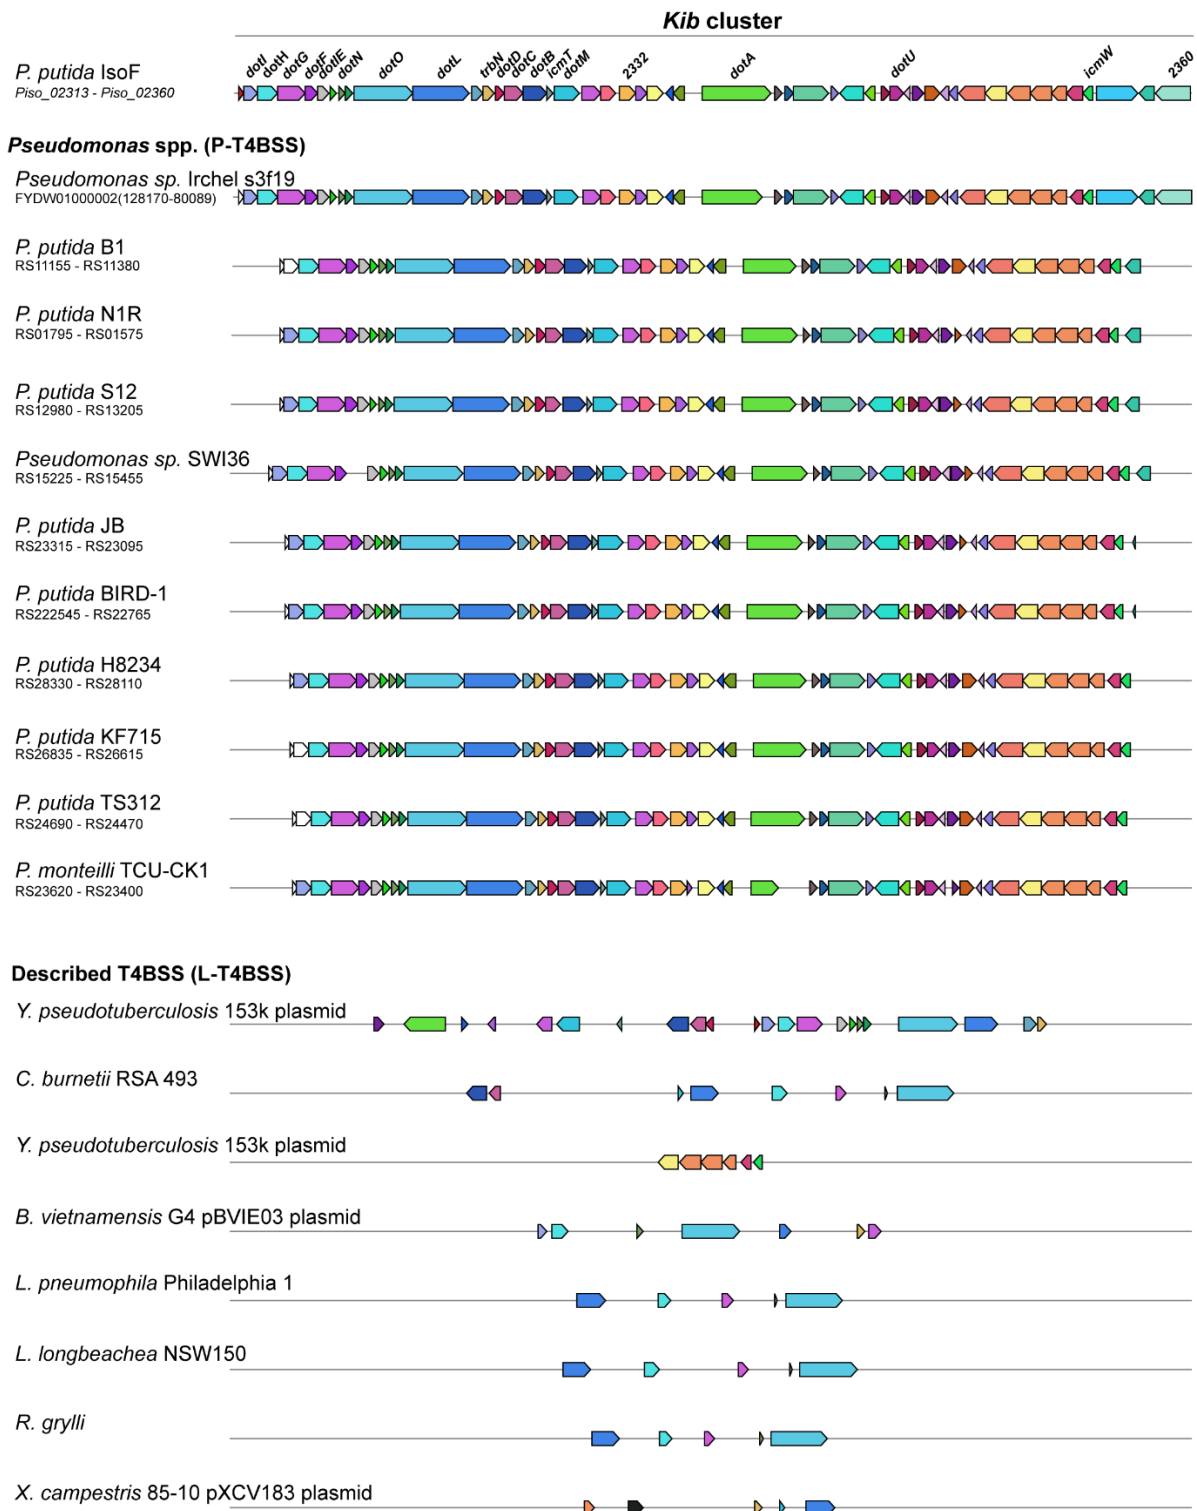

**Extended Data Figure 5. MultiGeneBlast alignment of IsoF *kib* genes with homologs of *Pseudomonas* and other T4BSS-encoding bacteria.** MultiGeneBlast Alignment<sup>2</sup> of homologous regions from eleven *Pseudomonas* strains (P-T4BSS) and eight T4BSS-encoding bacteria as described by Nagai and Kubori, 2011<sup>3</sup> (L-T4BSS). Arrows represent genes and the color conservation indicates homology > 30 %. Gene identity threshold: 30%, hits mapped: 1000. Maximum distance between the genes in a locus is 10 kb.

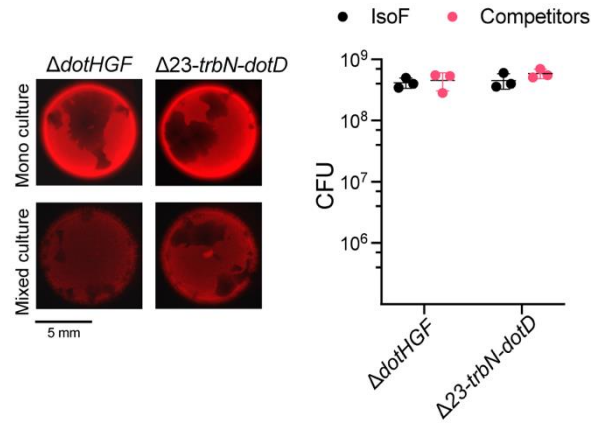

**Extended Data Figure 6. CDC between the IsoF wildtype and mutants  $\Delta dotHGF::mCherry$  and  $\Delta 23-trbN-dotD::mCherry$ .** Both mutant strains survived after 24 h of coinoculation. CFUs are mean  $\pm$  s.d. from three independent replicates (n=3). Representative images are shown.



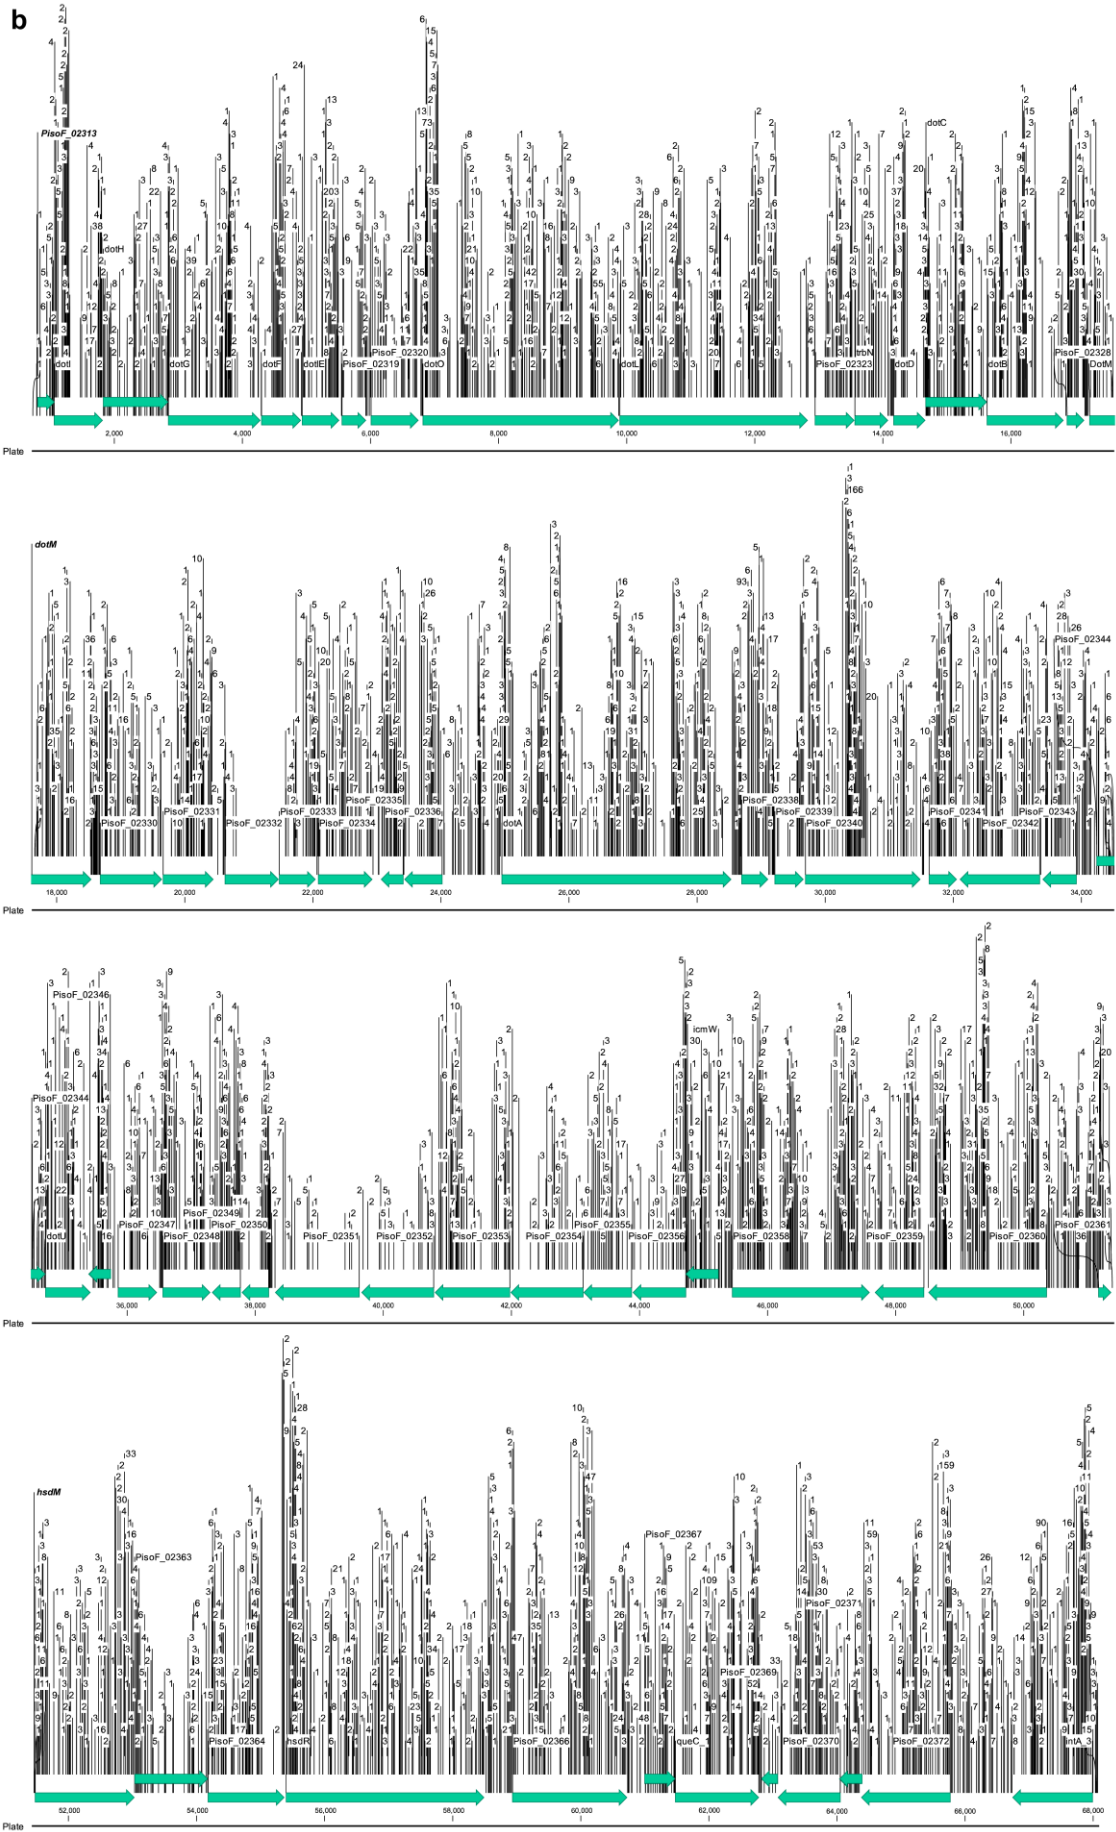







**Extended Data Figure 7. Transposon insertions mapped on the genomic island of IsoF.** The transposon insertion density in *Piso\_02332* was greatly reduced compared to the rest of the GI. **a**, growth in liquid medium. **b**, Growth on an agar surface **c**. Growth on an agar surface in the presence of *P. aureofaciens*.

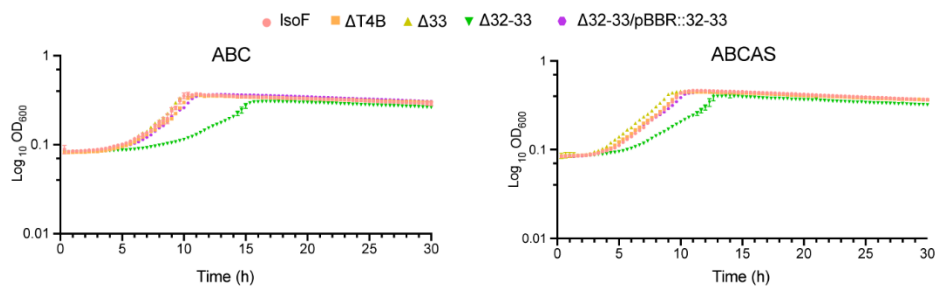

**Extended Data Figure 8. Growth of IsoF and various deletion mutants in ABC minimal medium in the absence or presence of casamino acids (ABCAS).** Data are mean  $\pm$  s.d. of two biological replicates (n=2).

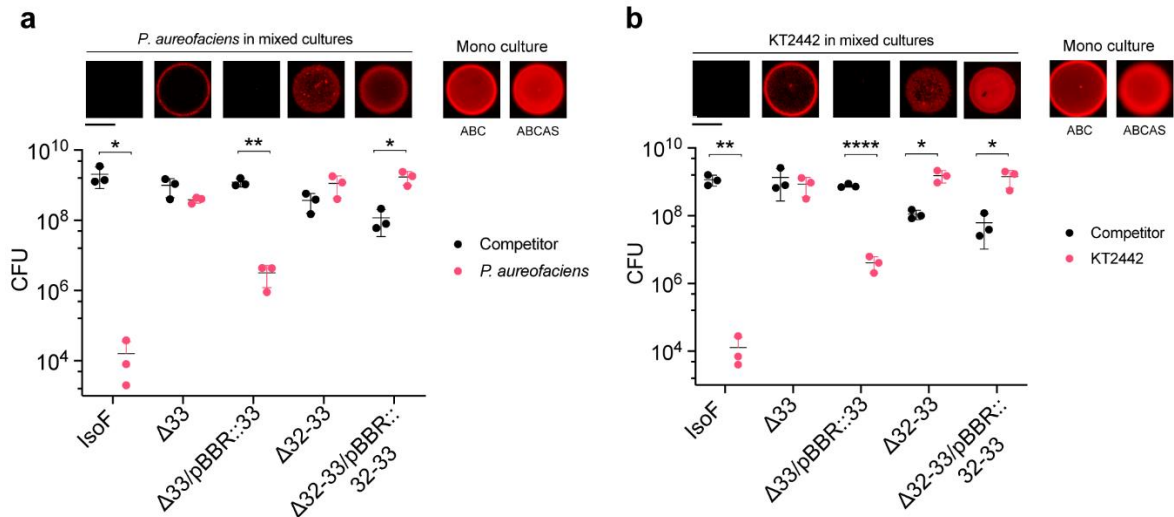

**Extended Data Figure 9. CDC against a. *P. aureofaciens*::mCherry and b. KT2442::mCherry.** CFUs were determined after 24 h of competition. Representative pictures of each competition are shown on top of the CFU values. CFUs are mean  $\pm$  s.d. from three biological replicates (n=3). Unpaired t-test, \* $P < 0.05$ ; \*\* $P < 0.01$ ; \*\*\*\* $P < 0.0001$ . Scale bar, 5 mm.

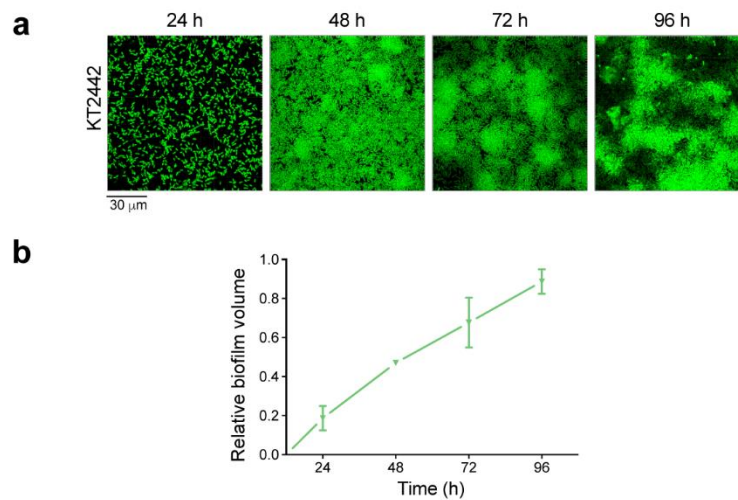

**Extended Data Figure 10. Biofilm development of KT2442::Gfp.** **a**, Representative pictures of biofilm development over 96 h. **b**, Quantification of biomass (relative volume) increase over time. Biofilms were visualized by CLSM using a 63 x 1.3 oil objective. Biomass (volume) of the biofilm was quantified by the Imaris software (Bitplane). Data are mean  $\pm$  s.d. of three biological replicates (n=3).

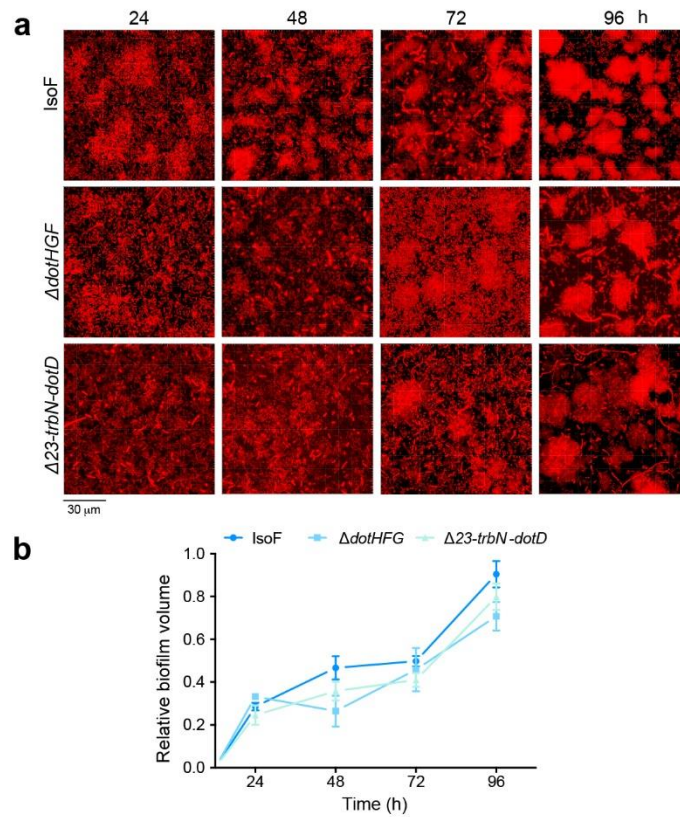

**Extended Data Figure 11. Biofilm formation of IsoF,  $\Delta dotHGF$  and  $\Delta 23-trbN-dotD$ .** **a**, Representative LSCM images of biofilm development over 96 h. **b**, Quantification of biofilm biomass. Data are mean  $\pm$  s.d of three independent replicates (n=3).

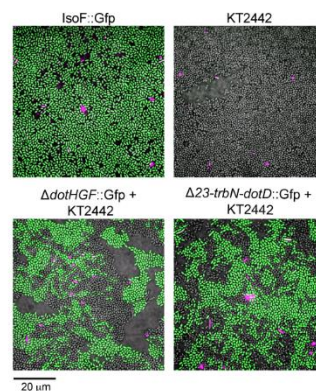

**Extended Data Figure 12. CDC of  $\Delta dotHGF$  and  $\Delta 23-trbN-dotD$  against KT2442.** Representative images of the IsoF::Gfp and KT2442 monocultures and the competition experiments after 18 h of incubation are shown. The medium was supplemented with PI to visualize dead cells (magenta) are shown.

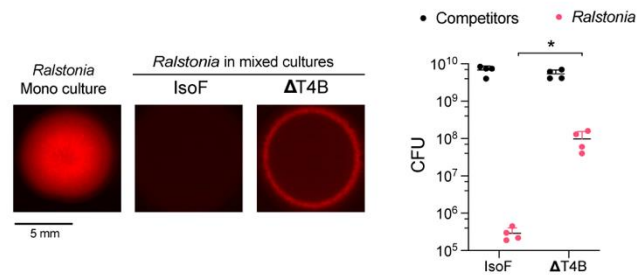

**Extended Data Figure 13. CDC between IsoF and  $\Delta T4B$  against *R. solanacearum* tagged with mCherry.** *R. solanacearum* coexists with the  $\Delta T4B$  mutant but is eradicated by the wild-type strain. CFUs were determined after 24h. Representative pictures shown. Data are mean  $\pm$  s.d. of three independent experiments (n=3). Unpaired t-test, \* $P < 0.05$ .

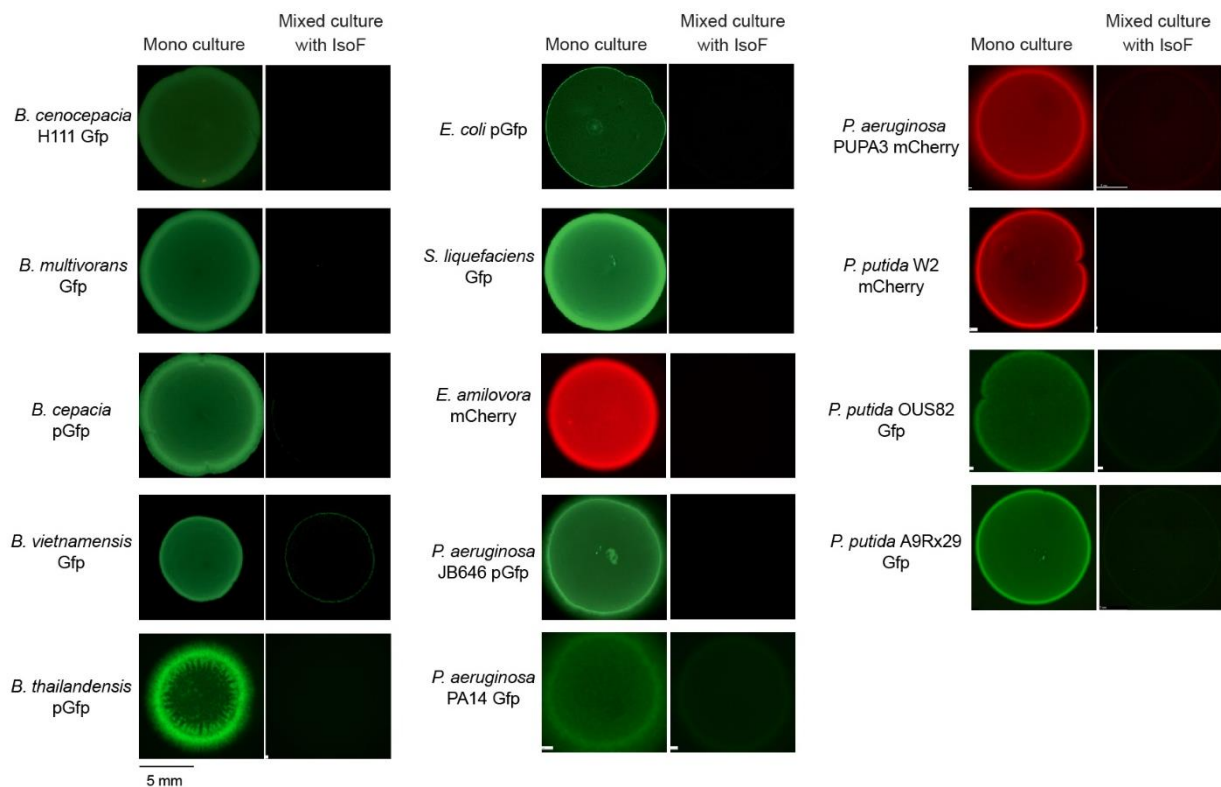

**Extended Data Figure 14. IsoF outcompetes a wide range of Gram-negative bacteria.** Various fluorescently tagged bacteria were competed against the IsoF wildtype. Fluorescence images of the mono and mixed cultures after 24 h of incubation are shown. Lack of fluorescence indicates that IsoF outcompeted the bacterial strain.

## Extended Data Tables

**Extended Data Table 1.** List of Pseudomonads carrying the T4BSS cluster elements and the comparison of the GC content, the nucleotide identity and the query cover shared with IsoF

| Strain                                                  | GC content (%) |                     |                         | T4BSS gene cluster (%) |          | Isolated from |
|---------------------------------------------------------|----------------|---------------------|-------------------------|------------------------|----------|---------------|
|                                                         | T4BSS cluster  | Genome <sup>3</sup> | Difference <sup>4</sup> | Query cover            | Identity |               |
| <i>P. putida</i> H8234                                  | 60.42          | 62.32               | 1.9                     | 60                     | 84.82    | Clinical      |
| <i>P. putida</i> BIRD-1                                 | 60.41          | 62.42               | 2.01                    | 56                     | 84.03    | Rhizosphere   |
| <i>P. putida</i> JB                                     | 60.36          | 62.51               | 2.15                    | 55                     | 84.05    | Soil          |
| <i>P. putida</i> N1R                                    | 60.36          | 62.65               | 2.29                    | 57                     | 84.05    | Soil          |
| <i>P. putida</i> S12                                    | 60.34          | 62.51               | 2.17                    | 59                     | 84.09    | Soil          |
| <i>Pseudomonas</i> sp. SWI36                            | 60.36          | 62.54               | 2.18                    | 57                     | 85.02    | Soil          |
| <i>P. putida</i> KF715                                  | 60.28          | 62.65               | 2.37                    | 61                     | 84.81    | Soil          |
| <i>P. putida</i> B1                                     | 60.29          | 62.69               | 2.4                     | 59                     | 84.77    | Soil          |
| <i>Pseudomonas</i> sp. Irchel s3f19                     | 60.24          | 62.76               | 2.52                    | 75                     | 99.67    | Soil          |
| <i>P. monteilii</i> TCU-CK1                             | 59.67          | 62.64               | 2.97                    | 64                     | 84.8     | Soil          |
| <i>P. putida</i> TS312                                  | 59.8           | 62.92               | 3.12                    | 61                     | 84.8     | Paper mill    |
| <i>P. putida</i> IsoF – <i>kib</i> cluster <sup>1</sup> | 60.09          | 63.34               | 3.25                    | -                      | -        | Rhizosphere   |
| <i>P. putida</i> IsoF – GI <sup>2</sup>                 | 58.76          | 63.36               | 4.6                     | -                      | -        |               |

<sup>1</sup> The GC percentage of the T4BSS cluster region

<sup>2</sup> The GC percentage of the entire IsoF genomic island (I-GI) including the T4BSS cluster, the Type I RM system and the integrase

<sup>3</sup> Genome GC content % excluding the correspondent T4BSS or T4BSS cluster/I-GI region

<sup>4</sup> Difference between the T4BSS cluster % minus the Genome %

**Extended Data Table 2.** Transposon sequencing results for each treatment

| Treatments | Total no. of reads | No. of unique insertion sites | Insertion frequency (bp) | No. of essential genes |
|------------|--------------------|-------------------------------|--------------------------|------------------------|
| Liquid     | 7,364,199          | 764,392                       | 7.7                      | 607                    |
| Solid      | 7,054,399          | 649,830                       | 9.1                      | 616                    |
| Mixed      | 7,419,977          | 851,838                       | 6.9                      | 644                    |

**Extended Data Table 3.** Unique transposon insertions found within the I-GI including *kib* cluster genes. Red highlighted row indicates the gene found to be essential in all treatments.

| Locus_tag   | Description                                        | Liquid           |                  | Solid |     | Mixed |     |
|-------------|----------------------------------------------------|------------------|------------------|-------|-----|-------|-----|
|             |                                                    | UID <sup>1</sup> | UIC <sup>2</sup> | UID   | UIC | UID   | UIC |
| PisoF_02313 | hypothetical protein                               | 0.080            | 21               | 0.071 | 19  | 0.080 | 21  |
| PisoF_02314 | type IV secretion protein DotI/lcmL                | 0.086            | 65               | 0.088 | 67  | 0.100 | 76  |
| PisoF_02315 | type IV secretion system protein lcmK/DotH         | 0.058            | 59               | 0.068 | 69  | 0.057 | 58  |
| PisoF_02316 | type IV secretion protein DotG/lcmE                | 0.094            | 136              | 0.080 | 115 | 0.101 | 146 |
| PisoF_02317 | type IV secretion protein DotF                     | 0.120            | 75               | 0.113 | 70  | 0.097 | 60  |
| PisoF_02318 | type IV secretion protein DotIE                    | 0.071            | 42               | 0.080 | 47  | 0.048 | 28  |
| PisoF_02319 | hypothetical protein                               | 0.096            | 37               | 0.052 | 20  | 0.078 | 30  |
| PisoF_02320 | type IV secretion system protein DotN              | 0.075            | 56               | 0.072 | 54  | 0.067 | 50  |
| PisoF_02321 | type IV secretion system protein lcmB/DotO         | 0.095            | 292              | 0.089 | 273 | 0.086 | 263 |
| PisoF_02322 | type IV secretion system protein lcmO/DotL         | 0.064            | 188              | 0.060 | 176 | 0.058 | 172 |
| PisoF_02323 | hypothetical protein                               | 0.067            | 42               | 0.070 | 43  | 0.063 | 39  |
| PisoF_02324 | conjugal transfer protein TrbN                     | 0.037            | 20               | 0.051 | 27  | 0.042 | 22  |
| PisoF_02325 | type IV secretion system protein DotD              | 0.071            | 36               | 0.050 | 25  | 0.043 | 21  |
| PisoF_02326 | type IV secretion system protein DotC              | 0.051            | 49               | 0.060 | 58  | 0.043 | 41  |
| PisoF_02327 | type IV secretion protein DotB                     | 0.110            | 132              | 0.089 | 107 | 0.085 | 102 |
| PisoF_02328 | type IV secretion system protein lcmT              | 0.056            | 15               | 0.077 | 21  | 0.078 | 21  |
| PisoF_02329 | type IV secretion system protein lcmP/DotM         | 0.082            | 109              | 0.058 | 76  | 0.052 | 69  |
| PisoF_02330 | disulfide isomerase/thiol-disulfide oxidase        | 0.030            | 29               | 0.036 | 35  | 0.029 | 28  |
| PisoF_02331 | hypothetical protein                               | 0.031            | 25               | 0.035 | 28  | 0.031 | 24  |
| PisoF_02332 | hypothetical protein                               | 0.009            | 8                | 0.002 | 2   | 0.006 | 5   |
| PisoF_02333 | hypothetical protein                               | 0.034            | 20               | 0.024 | 14  | 0.020 | 11  |
| PisoF_02334 | hypothetical protein                               | 0.059            | 50               | 0.035 | 30  | 0.061 | 52  |
| PisoF_02335 | hypothetical protein                               | 0.034            | 12               | 0.048 | 17  | 0.047 | 17  |
| PisoF_02336 | hypothetical protein                               | 0.060            | 36               | 0.057 | 34  | 0.072 | 43  |
| PisoF_02337 | type IV secretion system protein DotA-like protein | 0.068            | 244              | 0.070 | 251 | 0.062 | 221 |
| PisoF_02338 | hypothetical protein                               | 0.101            | 43               | 0.110 | 46  | 0.113 | 47  |
| PisoF_02339 | hypothetical protein                               | 0.023            | 10               | 0.026 | 12  | 0.039 | 18  |
| PisoF_02340 | hypothetical protein                               | 0.078            | 141              | 0.073 | 132 | 0.053 | 95  |
| PisoF_02341 | hypothetical protein                               | 0.062            | 27               | 0.053 | 23  | 0.042 | 18  |
| PisoF_02342 | hypothetical protein                               | 0.101            | 127              | 0.105 | 132 | 0.106 | 133 |
| PisoF_02343 | hypothetical protein                               | 0.096            | 51               | 0.099 | 53  | 0.103 | 55  |



| Locus_tag                                    | Description                                           | Liquid |     | Solid |     | Mixed |     |
|----------------------------------------------|-------------------------------------------------------|--------|-----|-------|-----|-------|-----|
|                                              |                                                       | UID    | UIC | UID   | UIC | UID   | UIC |
| PisoF_02344                                  | hypothetical protein                                  | 0.073  | 36  | 0.065 | 32  | 0.081 | 40  |
| PisoF_02345                                  | type IV secretion system protein DotU                 | 0.110  | 78  | 0.121 | 86  | 0.133 | 94  |
| PisoF_02346                                  | hypothetical protein                                  | 0.064  | 22  | 0.086 | 30  | 0.059 | 21  |
| PisoF_02347                                  | hypothetical protein                                  | 0.033  | 20  | 0.034 | 21  | 0.039 | 24  |
| PisoF_02348                                  | hypothetical protein                                  | 0.065  | 48  | 0.060 | 45  | 0.077 | 57  |
| PisoF_02349                                  | hypothetical protein                                  | 0.104  | 47  | 0.116 | 52  | 0.088 | 40  |
| PisoF_02350                                  | hypothetical protein                                  | 0.050  | 21  | 0.073 | 31  | 0.061 | 26  |
| PisoF_02351                                  | hypothetical protein                                  | 0.009  | 12  | 0.008 | 10  | 0.010 | 14  |
| PisoF_02352                                  | peptidase M23                                         | 0.025  | 29  | 0.011 | 13  | 0.013 | 14  |
| PisoF_02353                                  | hypothetical protein                                  | 0.040  | 48  | 0.027 | 32  | 0.035 | 41  |
| PisoF_02354                                  | hypothetical protein                                  | 0.026  | 30  | 0.016 | 18  | 0.012 | 14  |
| PisoF_02355                                  | hypothetical protein                                  | 0.044  | 33  | 0.030 | 23  | 0.025 | 19  |
| PisoF_02356                                  | hypothetical protein                                  | 0.072  | 60  | 0.065 | 54  | 0.070 | 59  |
| PisoF_02357                                  | type IV secretion protein lcmW                        | 0.074  | 38  | 0.069 | 36  | 0.054 | 28  |
| PisoF_02358                                  | hypothetical protein                                  | 0.187  | 401 | 0.176 | 379 | 0.169 | 364 |
| PisoF_02359                                  | nuclease                                              | 0.092  | 71  | 0.079 | 61  | 0.081 | 63  |
| PisoF_02360                                  | DNA helicase II                                       | 0.165  | 305 | 0.145 | 268 | 0.151 | 280 |
| PisoF_02361                                  | putative transcriptional regulator                    | 0.100  | 20  | 0.083 | 17  | 0.093 | 19  |
| PisoF_02362                                  | Type I restriction enzyme EcoKI M protein             | 0.161  | 250 | 0.129 | 201 | 0.133 | 207 |
| PisoF_02363                                  | Type I restriction enzyme specificity protein MPN_089 | 0.100  | 115 | 0.079 | 91  | 0.069 | 79  |
| PisoF_02364                                  | anticodon nuclease                                    | 0.070  | 83  | 0.048 | 58  | 0.048 | 58  |
| PisoF_02365                                  | Type I restriction enzyme EcoR124II R protein         | 0.126  | 392 | 0.119 | 368 | 0.117 | 364 |
| PisoF_02366                                  | putative P-loop ATPase                                | 0.138  | 248 | 0.135 | 242 | 0.118 | 212 |
| PisoF_02367                                  | hypothetical protein                                  | 0.069  | 33  | 0.062 | 30  | 0.046 | 22  |
| PisoF_02368                                  | 7-cyano-7-deazaguanine synthase                       | 0.109  | 143 | 0.103 | 135 | 0.091 | 119 |
| PisoF_02369                                  | hypothetical protein                                  | 0.107  | 28  | 0.073 | 19  | 0.105 | 27  |
| PisoF_02370                                  | integrase                                             | 0.093  | 91  | 0.096 | 94  | 0.087 | 85  |
| PisoF_02371                                  | hypothetical protein                                  | 0.182  | 65  | 0.200 | 72  | 0.172 | 62  |
| PisoF_02372                                  | hypothetical protein                                  | 0.098  | 137 | 0.088 | 123 | 0.109 | 153 |
| PisoF_02373                                  | prophage CP4-57 integrase                             | 0.146  | 184 | 0.155 | 195 | 0.160 | 201 |
| Total number of UIC in the I-GI <sup>3</sup> |                                                       | 5283   |     | 4912  |     | 4793  |     |

<sup>1</sup> UID: Unique insertion density

<sup>2</sup> UIC: Unique insertion count

<sup>3</sup> Normalized number of UIC using the number of unique insertion sites from Table 2.

## References

1. Darling, A. C. E., Mau, B., Blattner, F. R. & Perna, N. T. Mauve: Multiple alignment of conserved genomic sequence with rearrangements. *Genome Res.* **14**, 1394–1403 (2004).
2. Medema, M. H., Takano, E. & Breitling, R. Detecting sequence homology at the gene cluster level with MultiGeneBlast. *Mol. Biol. Evol.* **30**, 1218–1223 (2013).
3. Nagai, H. & Kubori, T. Type IVB secretion systems of *Legionella* and other Gram-negative bacteria. *Front. Microbiol.* **2**, 1–12 (2011).
